# Supplementary material for: Trade and environment : policy responses
Source: Oxford University Press journal article supplement (doi:10.1242/jcs.259596), 2012-01-01
Supplement: jcs259596supp.pdf [file jcs259596supp.pdf]

## Figure S1

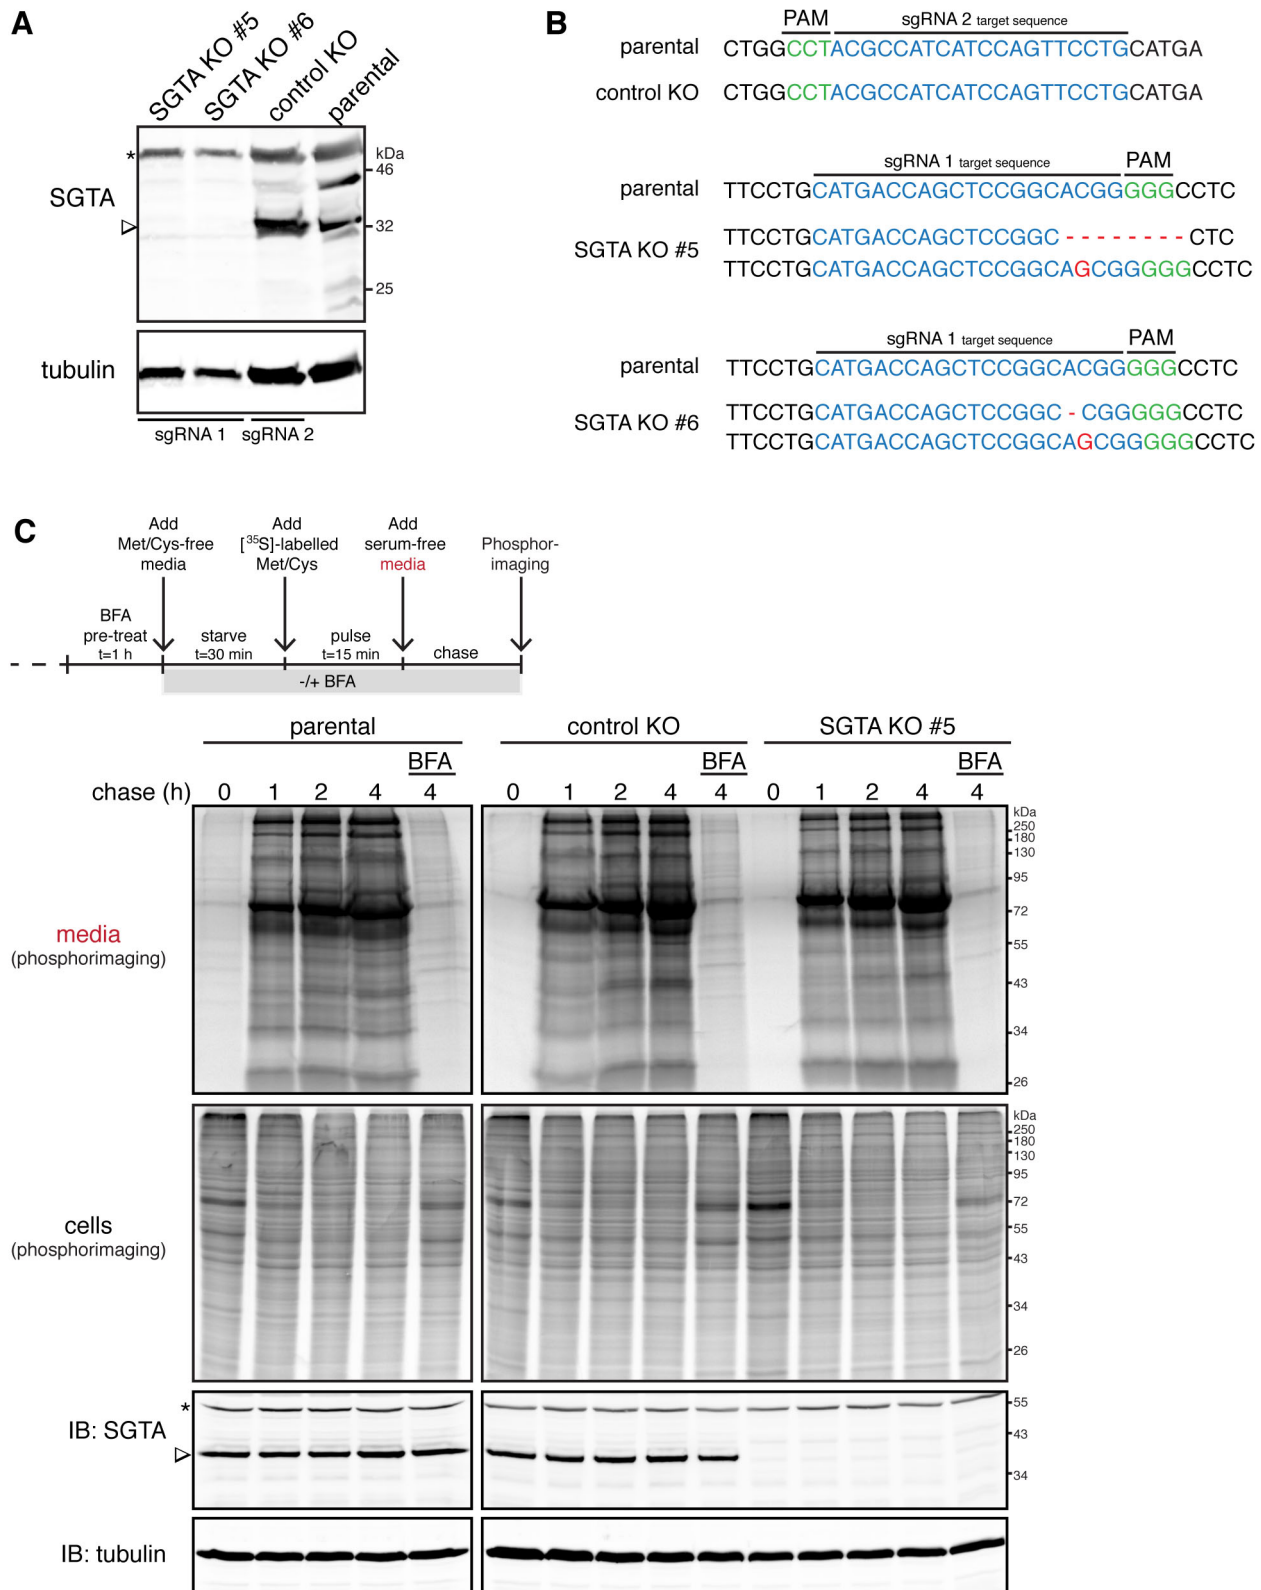

**Fig. S1. Confirmation of SGTA KO in HepG2 cells.** CRISPR-Cas9-mediated disruption of exon 2 of the SGTA gene in HepG2 cells resulted in a loss of SGTA. For the generation of SGTA KO cells, we designed single guide RNAs (sgRNAs) targeting the exon 2 of human SGTA (see Materials and Methods), which is present in all putative SGTA isoforms (Ensemble accession ENSG00000104969). SGTA KO clonal cell lines #5 (used hereafter) and #6 were obtained using sgRNA 1. Control KO cells are clones that underwent the same manipulation with SGTA KO cells using sgRNA 2, but retained SGTA expression. (A) Total lysates from parental, control KO and SGTA KO HepG2 cells were analysed by immunoblotting with anti-SGTA and anti-tubulin antibodies. The SGTA signal is marked by an arrowhead, while a non-specific band retained in SGTA KO cells is indicated by an asterisk. (B) Sequence alignment of partial SGTA coding sequences from parental and control KO/SGTA KO HepG2 cells. PAM (protospacer adjacent motif), green; sgRNA target sequence, blue; mutated sequence, red. (C) SGTA deficiency does not inhibit global protein secretion. HepG2 cells were left untreated or treated with brefeldin A (BFA; 2.5  $\mu\text{g}/\text{ml}$ ) for 1 h. Newly synthesised proteins were pulse-labelled for 15 min and then chased in serum-free medium containing unlabelled Met and Cys for various times in the absence or presence of BFA, as shown in the schematic representation of the assay. At the end of the chase, radiolabelled proteins in media (upper panel) and whole cell lysates (bottom panel) were resolved by SDS-PAGE and visualised by phosphorimaging. Whole cell lysates were also analysed by immunoblotting (IB) with anti-SGTA and anti-tubulin antibodies. The arrowhead points to the SGTA signal and the asterisk indicates a non-specific band.

## Figure S2

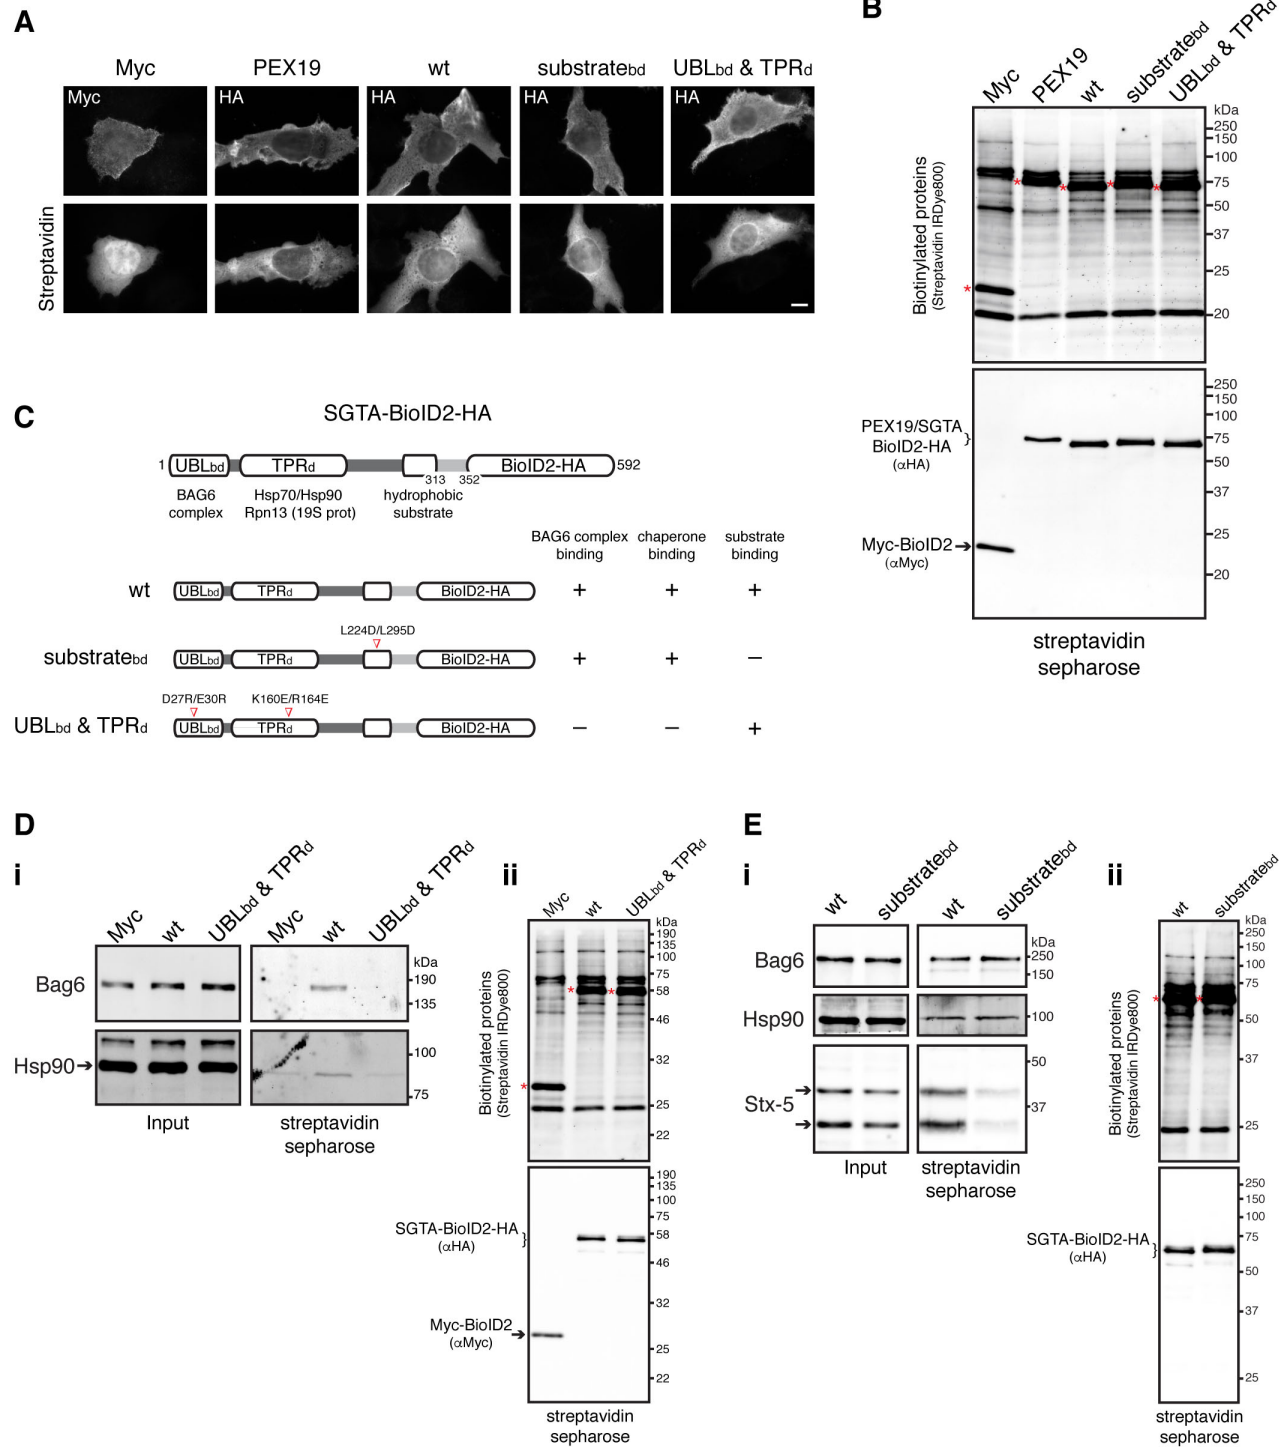

**Fig. S2. Validation of BioID2-based assay for proximity labelling of SGTA proteome. (A,B)**

Demonstration of the cytosolic localisation and the biotinylation activity of bait-BioID2 fusion proteins. SGTA KO cells transiently transfected with plasmids encoding Myc-BioID2, PEX19-BioID2 or the indicated SGTA-BioID2 variants were incubated with exogenous biotin for 8 h. (A) Cells were fixed and stained with anti-Myc/anti-HA and fluorophore-conjugated streptavidin to visualise BioID2-tagged baits and biotinylated proteins, respectively. Representative wide-field fluorescence images are shown. Scale bar, 10  $\mu$ m. (B) Cells were lysed and biotinylated proteins were isolated on streptavidin sepharose beads. The streptavidin-bound material was eluted using a biotin-containing buffer, resolved by SDS-PAGE and immunoblotted for BioID2-tagged baits (anti-Myc/anti-HA) or probed with streptavidin to detect total biotinylated proteins in each sample. The signals from self-biotinylated BioID2-tagged baits were detected at the predicted molecular weights and are marked with red asterisks. (C-E) Detection of known SGTA interactors by a small-scale streptavidin pull-down assay. SGTA KO cells transiently expressing the indicated BioID2-tagged baits (see schematic in C; also shown in Fig. 1A) were treated with biotin for 8 h. (Di,Ei) Whole cell lysates (Input) and biotinylated proteins (streptavidin sepharose) were analysed by immunoblotting for the indicated endogenous proteins. Note that samples were analysed on two different gels and the combined image was produced using the same brightness and contrast settings. (Dii,Eii) Biotinylated proteins (streptavidin sepharose) were analysed by immunoblotting for BioID2-tagged baits (anti-Myc/anti-HA) and total biotinylated proteins (Streptavidin IRDye800). The signals from self-biotinylated BioID2-tagged baits are marked with red asterisks. Syntaxin-5 (Stx-5) appears as two bands (hereafter indicated by arrows) corresponding to two isoforms, a 42 kDa-ER and a 35 kDa-Golgi isoform that result from an alternative initiation of translation (Coy-Vergara et al., 2019).

## Figure S3

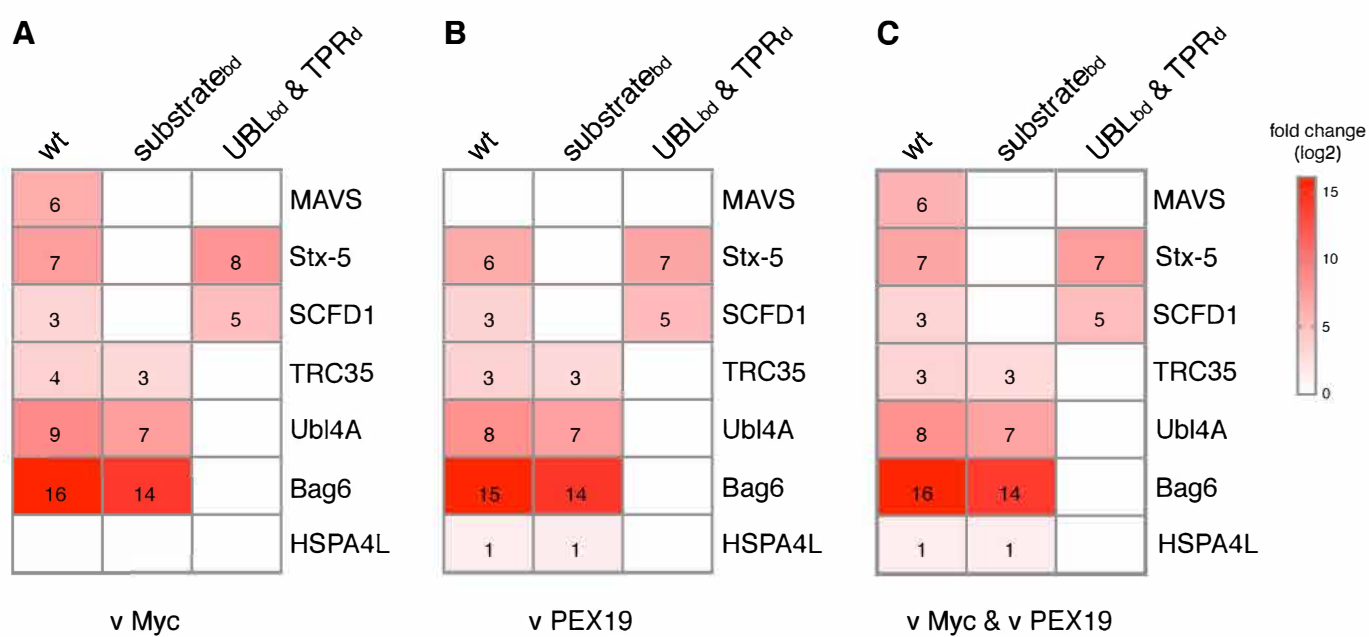

**Fig. S3. Profiling of SGTA interactors by proximity-labelling proteomics.** Heat maps representing log<sub>2</sub>-transformed fold changes in the protein intensities of high-confidence (BFDR<0.05) wild-type (wt)/mutant SGTA-specific preys relative to (A) Myc-BioID2, (B) PEX19-BioID2 and (C) both Myc-BioID2 and PEX19-BioID2 controls. Individual rounded values are depicted in the heat maps. A non-significant prey is shown as a white box (three biological replicates, see Tables S1-S3 for list of all the detected proteins).

## Figure S4

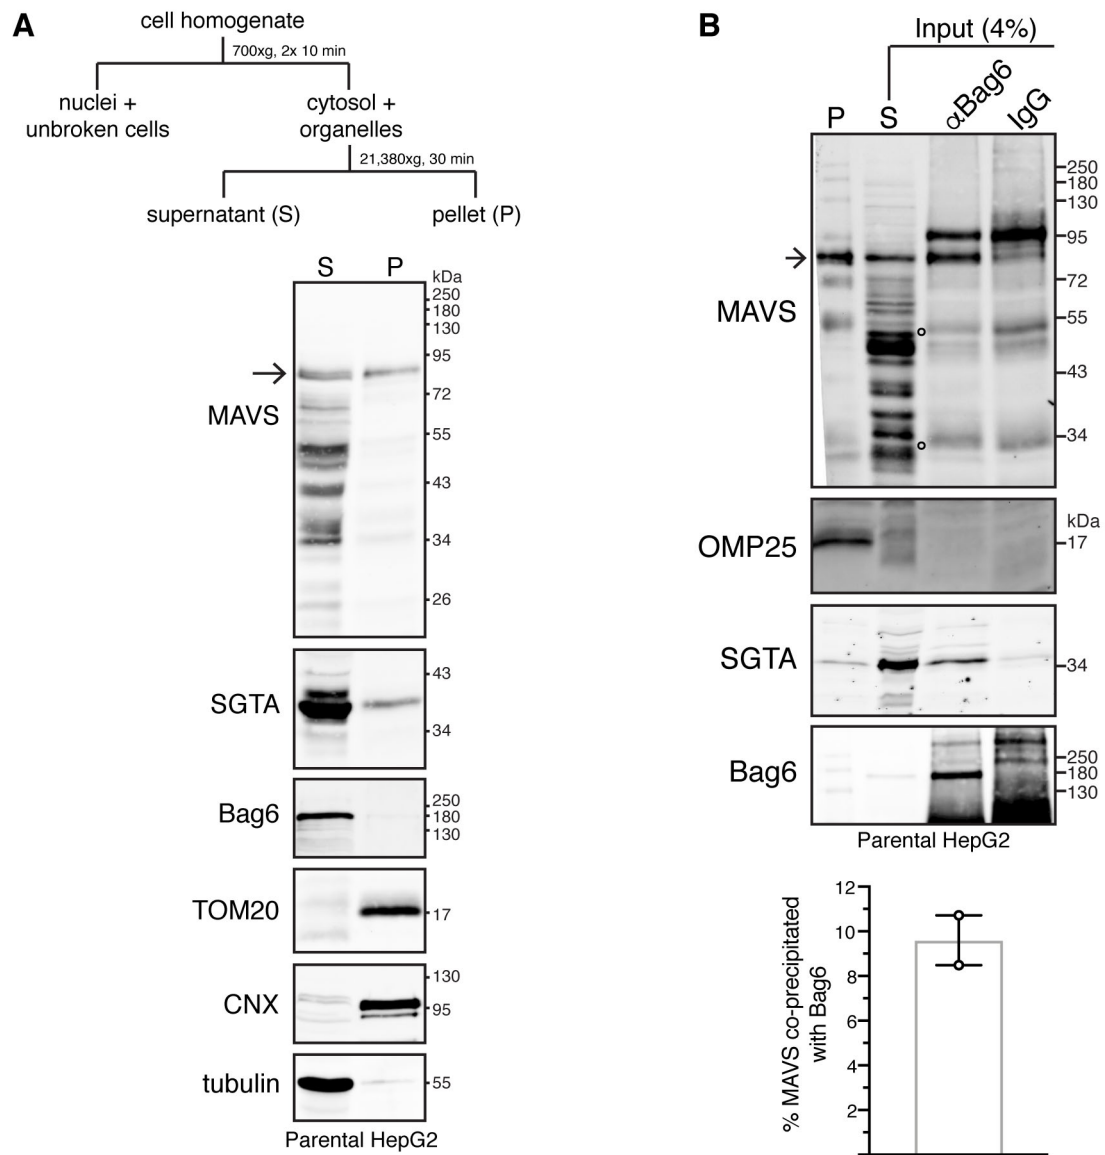

**Fig. S4. Bag6-MAVS interaction in parental HepG2 cells.** (A) Top: Schematic of the subcellular fractionation protocol used to separate the cell homogenate into crude cytosolic supernatant (S) and membrane-associated pellet (P) fractions. Bottom: Detergent-free extracts from parental HepG2 cells were fractionated as shown above. Equivalent amounts of each fraction were analysed by immunoblotting for MAVS and various compartmental markers. Bag6, SGTA and tubulin (cytosolic markers), TOM20 (mitochondrial outer membrane marker) and Calnexin (CNX, ER membrane marker) serve as fractionation controls. Full-length MAVS species (hereafter marked by an arrow) can be observed in both the cytosolic and membrane-associated fractions at steady-state (see also Fig. 2A). (B) MAVS, but not OMP25, co-immunoprecipitates with Bag6. The supernatant fraction from (A) was subjected to immunoprecipitations with equal amounts of rabbit anti-Bag6 antibody or rabbit IgG antibody (control for non-specific binding). Equivalent amounts of pellet (P) and supernatant (S) fractions from (A) and immunoprecipitates were analysed by immunoblotting for the indicated endogenous proteins. SGTA served as a positive control for Bag6 binding. Open circles on MAVS blot indicate signals derived from denatured antibody heavy and light chains. In contrast to full-length MAVS that is distributed in both fractions, OMP25 is predominantly present in the membrane-associated pellet fraction. The levels of MAVS that co-immunoprecipitate with Bag6 were reported as mean  $\pm$  s.e.m. for two independent experiments. (C) Sequences and properties of the transmembrane domains (TMDs) and C-terminal elements (CTEs) of the TA substrates used in this study. Sequences of TMDs were obtained from UniProt. For predicted hydrophathy, Grand Average of Hydrophathy (GRAVY) scores were calculated (<http://www.gravy-calculator.de>). For predicted  $\alpha$ -helicity, scores (% helical content) was calculated at pH 7.0, 310.15 K, ionic strength 0.13 M using the Agadir prediction algorithm (<http://agadir.crg.es>) (Munoz and Serrano, 1997). MOM, mitochondrial outer membrane; ER, endoplasmic reticulum.

## Figure S5

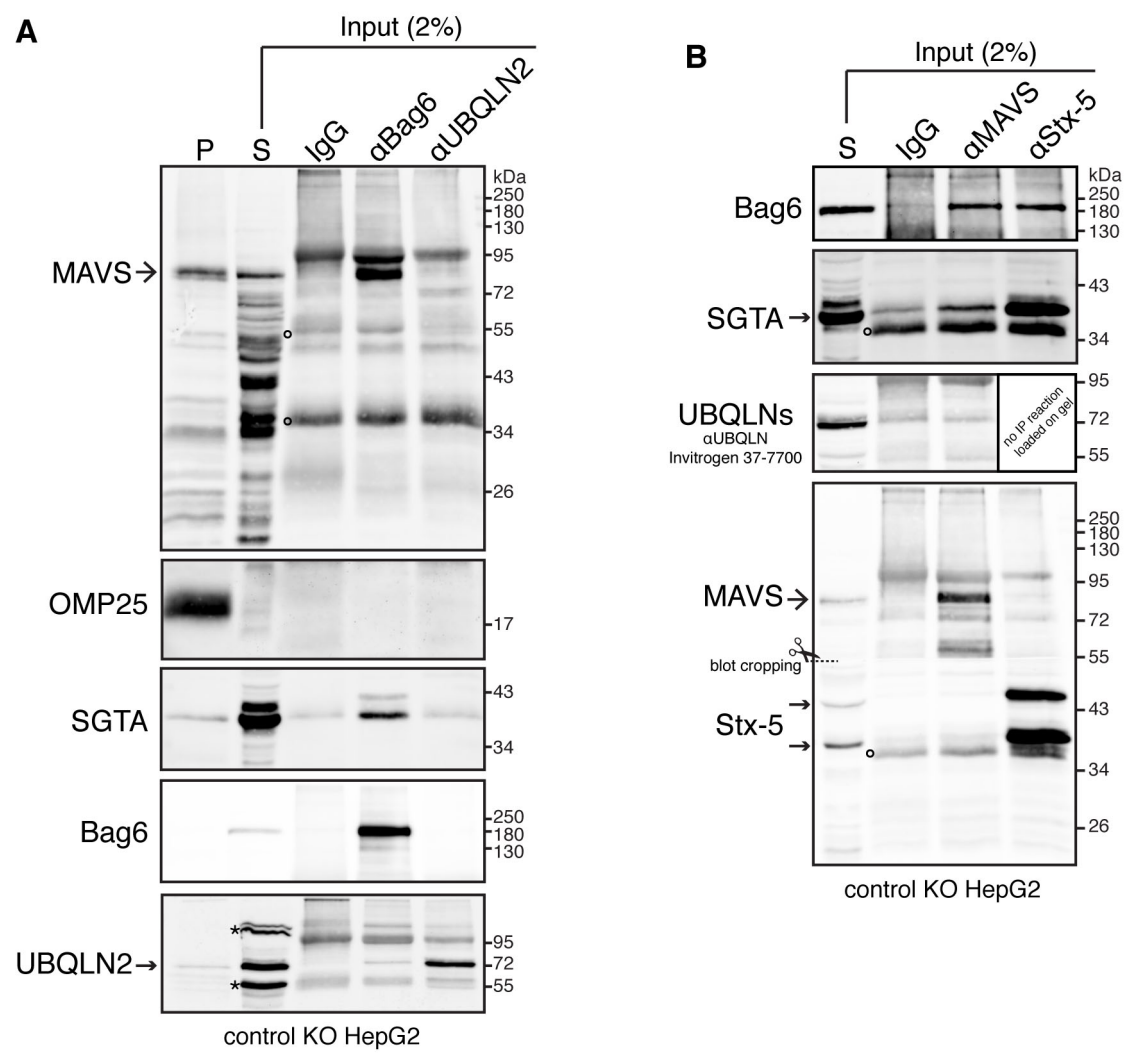



**Fig. S5. No association of MAVS with Ubiquilins can be detected by co-immunoprecipitation studies.** (A) MAVS does not co-immunoprecipitate with Ubiquilin-2 (UBQLN2). Control KO cells were fractionated as shown in the schematic of Fig. S4A and the supernatant fraction was subjected to immunoprecipitations with equal amounts of rabbit anti-Bag6, rabbit anti-UBQLN2 or rabbit IgG (control for non-specific binding) antibodies. Equivalent amounts of pellet (P) and supernatant (S) fractions and immunoprecipitates were analysed by immunoblotting for the indicated endogenous proteins. SGTA served as positive control for Bag6 binding. Asterisks indicate non-specific products. (B) Ubiquilins (UBQLNs) do not co-immunoprecipitate with MAVS. Control KO cells were fractionated as shown in the schematic of Fig. S4A and the supernatant (S) fraction was subjected to immunoprecipitations with equal amounts of rabbit anti-MAVS, rabbit anti-Stx-5 or rabbit IgG (control for non-specific binding) antibodies. Input and immunoprecipitates were analysed by immunoblotting for the indicated endogenous proteins. Note that the Invitrogen 37-7700 anti-UBQLN antibody recognises human UBQLN-1, -2 and -4 (Safren et al., 2015). In (A) and (B), open circles indicate signals derived from denatured antibody heavy and light chains.

## Figure S6

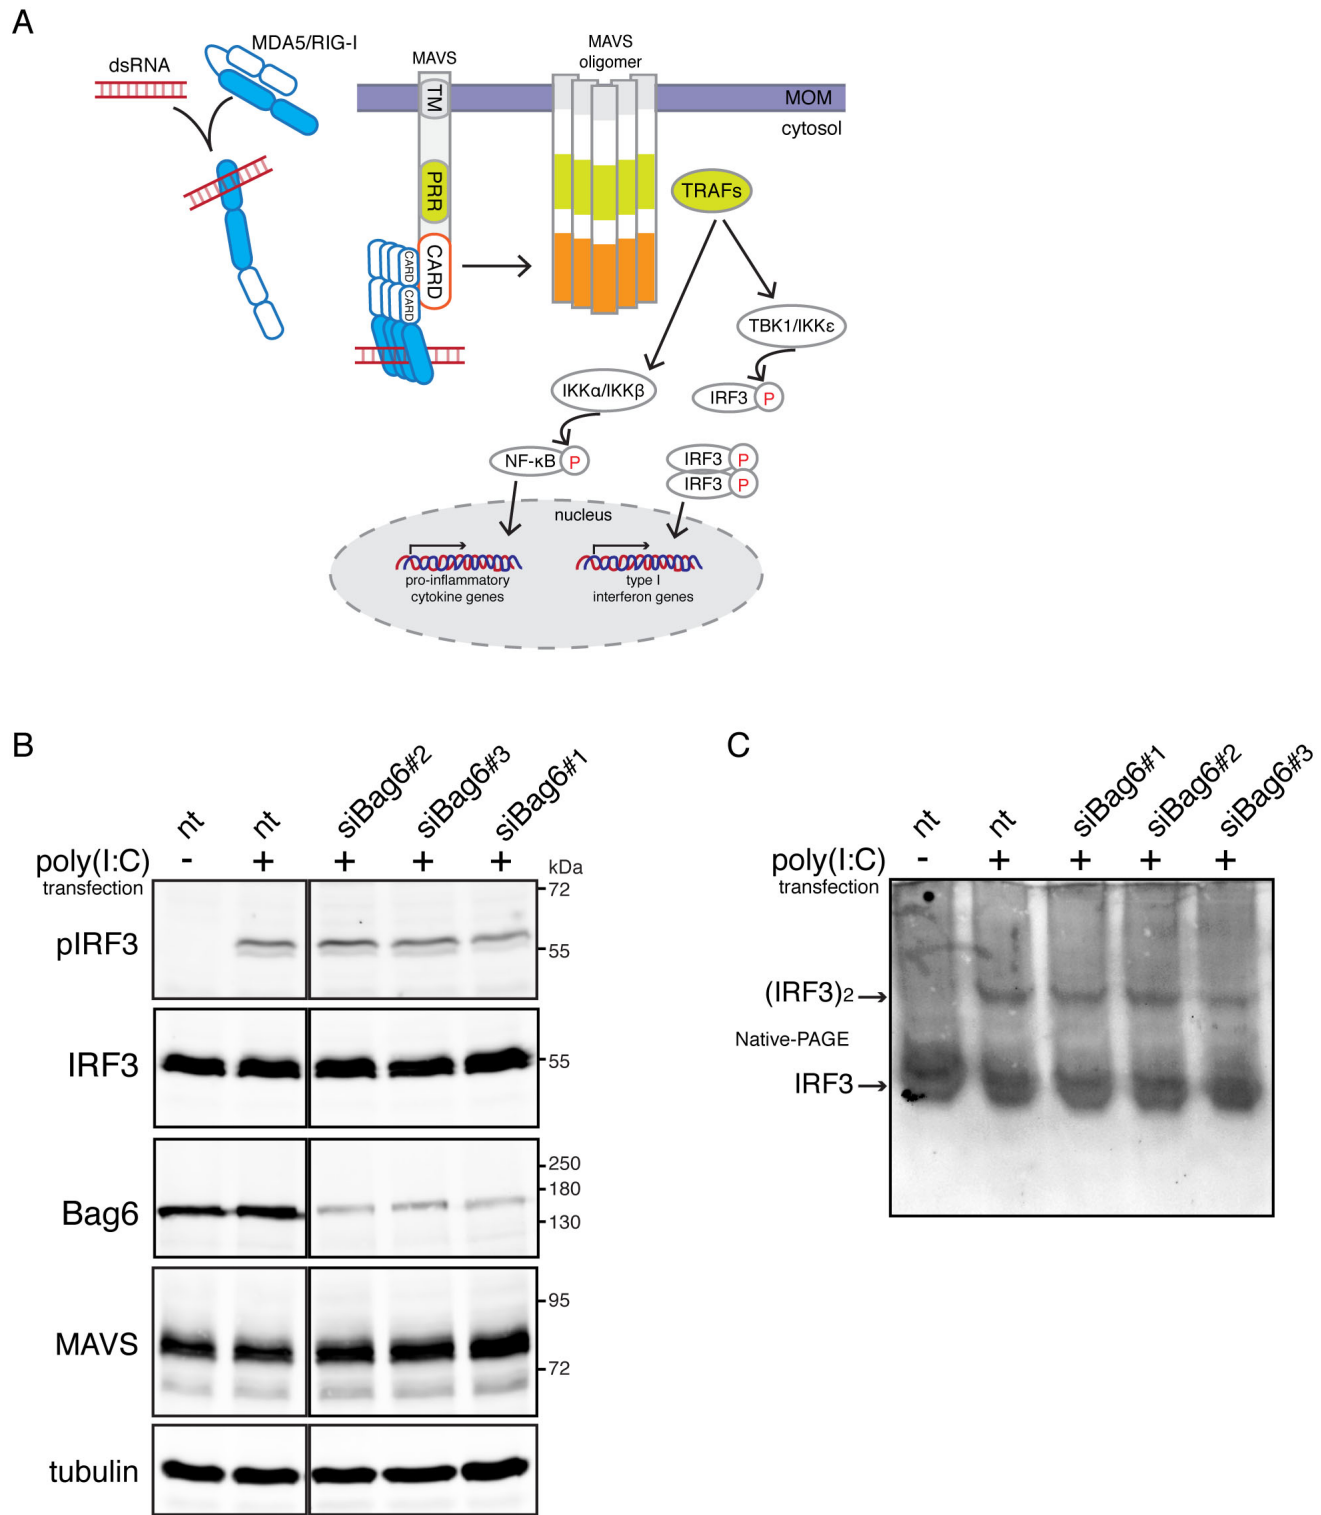

**Fig. S6. Bag6 does not modulate poly(I:C)-induced MAVS-dependent signalling.** (A) Schematic of RIG-I-like receptor (RLR)-dependent signalling pathway. Cytosolic double-stranded viral RNA is initially sensed by the host cell's RLRs (RIG-I and MDA5). Upon binding to the viral RNA, RLRs undergo a conformational change that exposes their caspase activation and recruitment domains (CARDs) for interactions with downstream signalling proteins. Modification of CARDs with K63 polyubiquitin chains results in the oligomerisation and activation of RLRs. Activated RLRs are recruited to the mitochondria outer membrane, where they interact with MAVS via their CARDs (Hou et al., 2011). This interaction as well as K63-linked polyubiquitination of MAVS (Liu et al., 2017) induces a conformational change leading to the formation of functional prion-like MAVS aggregates and activation of downstream signalling (Hou et al., 2011). MAVS aggregates form a signalling scaffold by recruiting and activating multiple tumour necrosis factor receptor-associated factors (TRAFs), which in turn recruit kinase complexes that phosphorylate the transcription factors IRF3 and NF- $\kappa$ B leading to the transcriptional upregulation of pro-inflammatory cytokines and type I interferons. (B,C) Bag6 depletion does not affect IRF3 activation in response to cytosolic poly(I:C). Control KO cells transfected with non-targeting (nt) or three independent Bag6-targeting siRNAs for 72 h were mock-treated (-) or treated with poly(I:C) (+) using typical transfection conditions (1  $\mu$ g/ml, 12 h) (Li et al., 2021; Liu et al., 2017; Zhang et al., 2020) and subsequently analysed by immunoblotting for the indicated endogenous proteins. In (B), all samples were analysed on the same gel and the combined image was produced using the same brightness and contrast settings.

## Figure S7

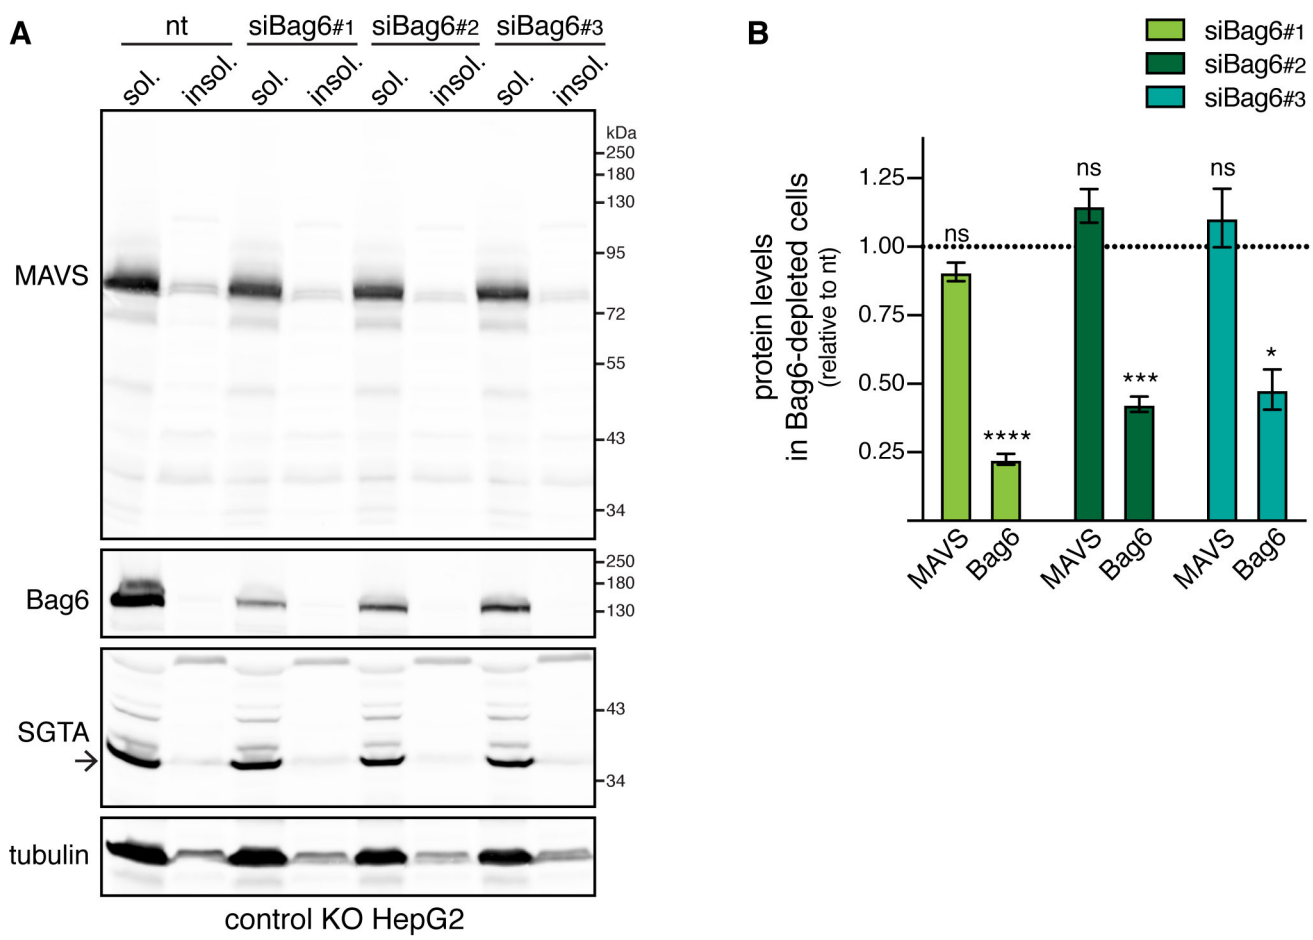

**Fig. S7. Bag6 deficiency does not affect steady-state MAVS levels or solubility.** (A) Control KO cells treated with non-targeting (nt) or three independent Bag6-targeting siRNAs for 72 h were harvested with a non-ionic detergent-containing lysis buffer. The resulting lysates were separated into soluble and insoluble fractions and analysed by immunoblotting for the indicated endogenous proteins. Note that endogenous MAVS appears to be uniformly soluble in Bag6-depleted cells. SGTA and tubulin remain uniformly soluble under all conditions and serve as fractionation and loading controls. (B) Bag6 and MAVS levels in siBag6-treated cells relative to nt siRNA-treated cells, where protein levels were set to 1. Shown are means  $\pm$  s.e.m. for four biological replicates as shown in (A). \*P < 0.05; \*\*\*P < 0.001; \*\*\*\*P < 0.0001; ns, not significant (one-way ANOVA with Dunnett's multiple comparison tests).

**Table S1. BioID2-derived proximity interactome of SGTA\_relative to both Myc-BioID2 and PEX19-BioID2 controls**

[Click here to download Table S1](#)

**Table S2. BioID2-derived proximity interactome of SGTA\_relative to Myc-BioID2 control**

[Click here to download Table S2](#)

**Table S3. BioID2-derived proximity interactome of SGTA\_relative to PEX19-BioID2 control**

[Click here to download Table S3](#)

## References

**Coy-Vergara, J., Rivera-Monroy, J., Urlaub, H., Lenz, C. and Schwappach, B.** (2019). A trap mutant reveals the physiological client spectrum of TRC40. *J Cell Sci* **132**, jcs230094. [doi:10.1242/jcs.230094](https://doi.org/10.1242/jcs.230094)

**Hou, F., Sun, L., Zheng, H., Skaug, B., Jiang, Q. X. and Chen, Z. J.** (2011). MAVS forms functional prion-like aggregates to activate and propagate antiviral innate immune response. *Cell* **146**, 448-461. [doi:10.1016/j.cell.2011.06.041](https://doi.org/10.1016/j.cell.2011.06.041)

**Li, S., Kuang, M., Chen, L., Li, Y., Liu, S., Du, H., Cao, L. and You, F.** (2021). The mitochondrial protein ERAL1 suppresses RNA virus infection by facilitating RIG-I-like receptor signaling. *Cell Rep* **34**, 108631. [doi:10.1016/j.celrep.2020.108631](https://doi.org/10.1016/j.celrep.2020.108631)

**Liu, B., Zhang, M., Chu, H., Zhang, H., Wu, H., Song, G., Wang, P., Zhao, K., Hou, J., Wang, X. et al.** (2017). The ubiquitin E3 ligase TRIM31 promotes aggregation and activation of the signaling adaptor MAVS through Lys63-linked polyubiquitination. *Nat Immunol* **18**, 214-224. [doi:10.1038/ni.3641](https://doi.org/10.1038/ni.3641)

**Munoz, V. and Serrano, L.** (1997). Development of the multiple sequence approximation within the AGADIR model of alpha-helix formation: comparison with Zimm-Bragg and Lifson-Roig formalisms. *Biopolymers* **41**, 495-509. [doi:10.1002/\(SICI\)1097-0282\(19970415\)41:5<495::AID-BIP2>3.0.CO;2-H](https://doi.org/10.1002/(SICI)1097-0282(19970415)41:5<495::AID-BIP2>3.0.CO;2-H)

**Safren, N., Chang, L., Dziki, K. M. and Monteiro, M. J.** (2015). Signature changes in ubiquitin expression in the R6/2 mouse model of Huntington's disease. *Brain Res* **1597**, 37-46. [doi:10.1016/j.brainres.2014.12.008](https://doi.org/10.1016/j.brainres.2014.12.008)

**Zhang, Z., Fang, X., Wu, X., Ling, L., Chu, F., Li, J., Wang, S., Zang, J., Zhang, B., Ye, S. et al.** (2020). Acetylation-Dependent Deubiquitinase OTUD3 Controls MAVS Activation in Innate Antiviral Immunity. *Mol Cell* **79**, 304-319 e7. [doi:10.1016/j.molcel.2020.06.020](https://doi.org/10.1016/j.molcel.2020.06.020)
